# Supplementary material
Source: publisher figshare collection journal article supplement (https://acs.figshare.com/ndownloader/files/19790387)
Supplement: Supplementary file 1 [file 19790387]

## Ligand-mediated nanocluster formation with classical and autocatalytic growth

Mohsen Farshad,<sup>‡</sup> Dylan Suvlu,<sup>‡</sup> and Jayendran C. Rasaiah<sup>\*</sup>

Department of Chemistry, University of Maine, Orono, Maine 04469, United States

### Supporting Information

#### List of Symbols

|            |                                                                       |
|------------|-----------------------------------------------------------------------|
| $k_{p,1}$  | Monomer formation rate coefficient, $s^{-1}$                          |
| $k_{p,2}$  | Reduction of ligand-associated monomer ion rate coefficient, $s^{-1}$ |
| $k_{b,1}$  | Ligand binding to metal atom rate coefficient, $M^{-1} s^{-1}$        |
| $k_{ub,1}$ | Ligand unbinding to metal atom rate coefficient, $s^{-1}$             |
| $k_{b,2}$  | Ligand binding to metal ion rate coefficient, $M^{-1} s^{-1}$         |
| $k_{ub,2}$ | Ligand unbinding to metal ion rate coefficient, $s^{-1}$              |
| $k_n$      | Self-dimerization rate coefficient, $M^{-1} s^{-1}$                   |
| $k_{n,ac}$ | Autocatalytic dimerization rate coefficient, $M^{-1} s^{-1}$          |
| $k_g$      | Monomer addition growth rate coefficient, $M^{-1} s^{-1}$             |
| $k_d$      | Monomer dissociation rate coefficient, $s^{-1}$                       |
| $k_{g,ac}$ | Autocatalytic growth rate coefficient, $M^{-1} s^{-1}$                |
| $k_{d,ac}$ | Autocatalytic dissociation rate coefficient, $s^{-1}$                 |
| $k_a$      | Ligand association rate coefficient, $M^{-1} s^{-1}$                  |
| $k_e$      | Ligand elimination rate coefficient, $s^{-1}$                         |
| $t$        | Time of reaction, $s$                                                 |
| $i$        | Number of monomers, —                                                 |

|                 |                                                                                   |
|-----------------|-----------------------------------------------------------------------------------|
| $j$             | Number of ligands, –                                                              |
| $[M^+]$         | Concentration of metal ion, M                                                     |
| $[M]$           | Concentration of metal atom, M                                                    |
| $[L]$           | Concentration of Ligand, M                                                        |
| $[ML]$          | Concentration of ligand associated metal atom, M                                  |
| $[ML^+]$        | Concentration of ligand associated metal ion, M                                   |
| $[C_{2,j}]$     | Concentration of dimer with $j$ ligands, M                                        |
| $[C_{i,j}]$     | Concentration of cluster with $i$ monomers and $j$ ligands, M                     |
| $\bar{[C]}_i$   | Concentration of cluster with $i$ monomers regardless of number of $j$ ligands, M |
| $\bar{[L]}_i$   | First order moment, M                                                             |
| $\bar{[L]}_i^2$ | Second order moment, M                                                            |
| $N_{s,i}$       | Number of sites on a cluster with $i$ monomers, –                                 |
| $p(j i)$        | probability of finding $j$ ligands on a given cluster of $i$ monomers, –          |
| $p_i$           | probability of finding a bound ligand with on a cluster with $i$ monomers, –      |
| $C(i,t)$        | Monomeric concentration of clusters with $i$ monomers at time $t$ , M             |
| $C(D,t)$        | Concentration of cluster with $i$ monomers at time $t$ , M                        |
| $D_M$           | Monomer diameter, m                                                               |

Here we present the rate equations in our model before and after applying method of moments.<sup>1</sup> The reaction scheme is reproduced below:

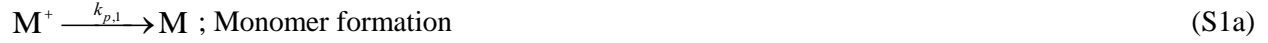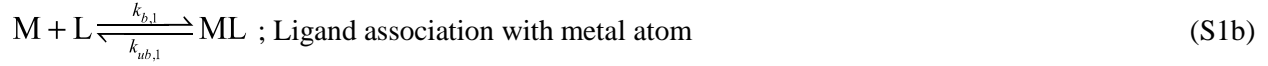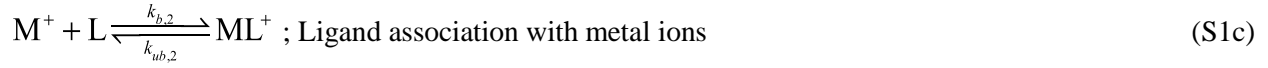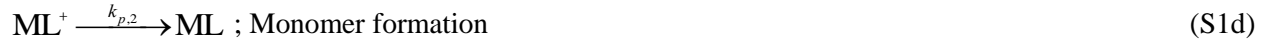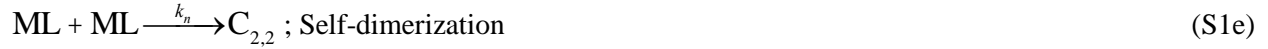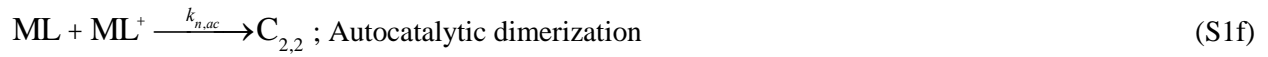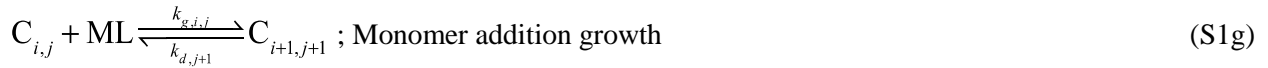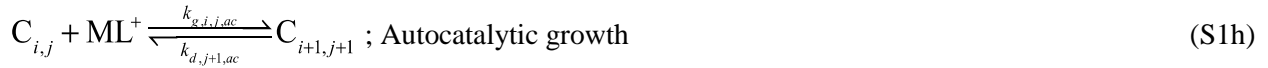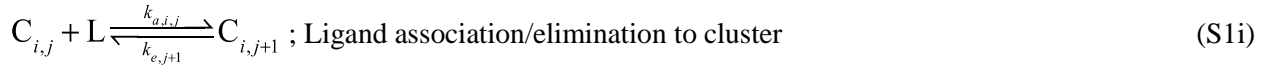

The minimum value of  $i$  is 2 and the maximum was set to 400 in calculations. The rate equations before applying method of moments of the above model are as follows:

$$\frac{d[M^+]}{dt} = -k_{p,1}[M^+] - k_{b,1}[M^+][L] + k_{ub,1}[ML^+] \quad (S2)$$

$$\frac{d[M]}{dt} = k_{p,1}[M^+] - k_{b,2}[M][L] + k_{ub,2}[ML] \quad (S3)$$

$$\begin{aligned} \frac{d[L]}{dt} = & -k_{b,1}[M][L] + k_{ub,1}[ML] - k_{b,2}[M^+][L] + k_{ub,2}[ML^+] \\ & - k_a \prod_{i=2}^{i_{\max}} \prod_{j=0}^{N_{s,i}} [C_{i,j}] (N_{s,i} - j) + k_e \prod_{i=2}^{i_{\max}} \prod_{j=0}^{N_{s,i}} [C_{i,j}] j \end{aligned} \quad (S4)$$

$$\begin{aligned} \frac{d[ML]}{dt} = & k_{p,2}[ML^+] + k_{b,1}[M][L] - k_{ub,1}[ML] - 2k_n[ML]^2 - k_{n,ac}[ML][ML^+] \\ & - k_g \prod_{i=2}^{i_{\max}} \prod_{j=0}^{N_{s,i}} [C_{i,j}] (N_{s,i} - j) + k_d \prod_{i=3}^{i_{\max}} \prod_{j=0}^{N_{s,i}} [C_{i,j}] j \end{aligned} \quad (S5)$$

$$\begin{aligned} \frac{d[\text{ML}^+]}{dt} &= k_{b,2}[\text{M}^+][\text{L}] - k_{ub,2}[\text{ML}^+] - k_{n,ac}[\text{ML}][\text{ML}^+] \\ &- k_{g,ac}[\text{ML}^+] \hat{a} \hat{a} [\text{C}_{i,j}] (N_{s,i} - j) + k_{d,ac} \hat{a} \hat{a} [\text{C}_{i,j}] j \end{aligned} \quad (\text{S6})$$

$$\begin{aligned} \frac{d}{dt}[\text{C}_{2,2}] &= k_n[\text{ML}]^2 + k_{n,ac}[\text{ML}][\text{ML}^+] - (k_g[\text{ML}] + k_{g,ac}[\text{ML}^+])[\text{C}_{2,2}](N_{s,2} - 2) \\ &+ (k_d + k_{d,ac})3[\text{C}_{3,3}] - k_a[\text{L}]\{[\text{C}_{2,2}](N_{s,2} - 2) - [\text{C}_{2,1}](N_{s,2} - 1)\} \\ &+ k_e\{3[\text{C}_{2,3}] - 2[\text{C}_{2,2}]\} \end{aligned} \quad (\text{S7})$$

$$\begin{aligned} \frac{d}{dt}[\text{C}_{i,j}] &= -(k_g[\text{ML}] + k_{g,ac}[\text{ML}^+])\{[\text{C}_{i,j}](N_{s,i} - j) - [\text{C}_{i-1,j-1}](N_{s,i-1} - j + 1)\} \\ &+ (k_d + k_{d,ac})\{[\text{C}_{i+1,j+1}](j + 1) - [\text{C}_{i,j}]j\} - k_a[\text{L}]\{[\text{C}_{i,j}](N_{s,i} - j) - [\text{C}_{i,j-1}](N_{s,i} - j + 1)\} \\ &+ k_e\{[\text{C}_{i,j+1}](j + 1) - [\text{C}_{i,j}]j\} \quad 3 \leq i \leq 400 \end{aligned} \quad (\text{S8})$$

As described in the main text, we used method of moments to convert the equations with two internal coordinates (2-D) to two one internal coordinates (1-D). The full set of equations used for calculations are as follows

$$\frac{d[\text{M}^+]}{dt} = -k_{p,1}[\text{M}^+] - k_{b,1}[\text{M}^+][\text{L}] + k_{ub,1}[\text{ML}^+] \quad (\text{S9})$$

$$\frac{d[\text{M}]}{dt} = k_{p,1}[\text{M}^+] - k_{b,2}[\text{M}][\text{L}] + k_{ub,2}[\text{ML}] \quad (\text{S10})$$

$$\begin{aligned} \frac{d[\text{L}]}{dt} &= -k_{b,1}[\text{M}][\text{L}] + k_{ub,1}[\text{ML}] - k_{b,2}[\text{M}^+][\text{L}] + k_{ub,2}[\text{ML}^+] \\ &- k_a[\text{L}] \sum_{i=2}^{i_{\max}} \{[\bar{\text{C}}_i]N_{s,i} - [\bar{\text{L}}_i]\} + k_e \sum_{i=2}^{i_{\max}} [\bar{\text{L}}_i] \end{aligned} \quad (\text{S11})$$

$$\begin{aligned} \frac{d[\text{ML}]}{dt} &= k_{p,2}[\text{ML}^+] + k_{b,1}[\text{M}][\text{L}] - k_{ub,1}[\text{ML}] - 2k_n[\text{ML}]^2 - k_{n,ac}[\text{ML}][\text{ML}^+] \\ &- k_g[\text{ML}] \sum_{i=2}^{i_{\max}} \{[\bar{\text{C}}_i]N_{s,i} - [\bar{\text{L}}_i]\} + k_d \sum_{i=3}^{i_{\max}} [\bar{\text{L}}_i] \end{aligned} \quad (\text{S12})$$

$$\begin{aligned} \frac{d[\text{ML}^+]}{dt} &= -k_{p,2}[\text{ML}^+] + k_{b,2}[\text{M}^+][\text{L}] - k_{ub,2}[\text{ML}^+] - k_{n,ac}[\text{ML}][\text{ML}^+] \\ &- k_{g,ac}[\text{ML}^+] \sum_{i=2}^{i_{\max}} \{[\bar{\text{C}}_i]N_{s,i} - [\bar{\text{L}}_i]\} + k_{d,ac} \sum_{i=3}^{i_{\max}} [\bar{\text{L}}_i] \end{aligned} \quad (\text{S13})$$

$$\begin{aligned} \frac{d}{dt}[\bar{C}_2] &= k_n[\text{ML}]^2 + k_{n,ac}[\text{ML}][\text{ML}^+] - (k_g[\text{ML}] + k_{g,ac}[\text{ML}^+])\{[\bar{C}_2]N_{s,2} - [\bar{L}_2]\} \\ &+ (k_d + k_{d,ac})[\bar{L}_3] \end{aligned} \quad (\text{S14})$$

$$\begin{aligned} \frac{d}{dt}[\bar{L}_2] &= k_n[\text{ML}]^2 + k_{n,ac}[\text{ML}][\text{ML}^+] - (k_g[\text{ML}] + k_{g,ac}[\text{ML}^+])\{[\bar{L}_2]N_{s,2} - [\bar{L}_2]\} \\ &+ (k_d + k_{d,ac})\{[\bar{L}_3] - [\bar{L}_3]\} - k_a[\text{L}]\{[\bar{C}_2]N_{s,2} - [\bar{L}_2]\} - k_e[\bar{L}_2] \end{aligned} \quad (\text{S16})$$

$$\begin{aligned} \frac{d}{dt}[\bar{C}_i] &= -(k_g[\text{ML}] + k_{g,ac}[\text{ML}^+])\{([\bar{C}_i]N_{s,i} - [\bar{L}_i]) - ([\bar{C}_{i-1}]N_{s,i-1} - [\bar{L}_{i-1}])\} \\ &+ (k_d + k_{d,ac})\{[\bar{L}_{i+1}] - [\bar{L}_i]\} \quad 3 \leq i \leq 400 \end{aligned} \quad (\text{S17})$$

$$\begin{aligned} \frac{d}{dt}[\bar{L}_i] &= -(k_g[\text{ML}] + k_{g,ac}[\text{ML}^+])\{([\bar{L}_i]N_{s,i} - [\bar{L}_i]) - ([\bar{C}_{i-1}]N_{s,i-1} + [\bar{L}_{i-1}](N_{s,i-1} - 1) - [\bar{L}_{i-1}])\} \\ &+ (k_d + k_{d,ac})\{([\bar{L}_{i+1}] - [\bar{L}_{i+1}]) - [\bar{L}_i]\} - k_a[\text{L}]\{[\bar{C}_i]N_{s,i} - [\bar{L}_i]\} - k_e[\bar{L}_i] \quad 3 \leq i \leq 400 \end{aligned} \quad (\text{S18})$$

We solved the equations numerically using ode15s solver in MATLAB. The solution to the equations provides the concentration of clusters with  $i$  monomers with average concentration of ligands on clusters with  $i$  monomers in time  $t$ . We convert the monomeric concentration of clusters to the concentration of clusters having a diameter  $D$  as described in the main text. Table S1 presents diameter intervals taken from Malvern Zetasizer Nano ZS instrument to create histograms using Eq. S19, S20.

$$C_{\text{hist}}(t) = \frac{\sum_{D_1 < D < D_2} C_D(t)}{\sum_i C_D(t)} \quad \text{S19}$$

$$D_{\text{hist}} = \frac{\sum_{D_1 < D < D_2} DC_D}{\sum_D C_D(D)} \quad \text{S20}$$

Table S1. Diameter intervals used in histograms.

| $D_1$ (nm) | $D_2$ (nm) |
|------------|------------|
| 0.000      | 0.400      |
| 0.400      | 0.463      |
| 0.463      | 0.536      |
| 0.536      | 0.621      |
| 0.621      | 0.719      |

|       |       |
|-------|-------|
| 0.719 | 0.833 |
| 0.833 | 0.965 |
| 0.965 | 1.117 |

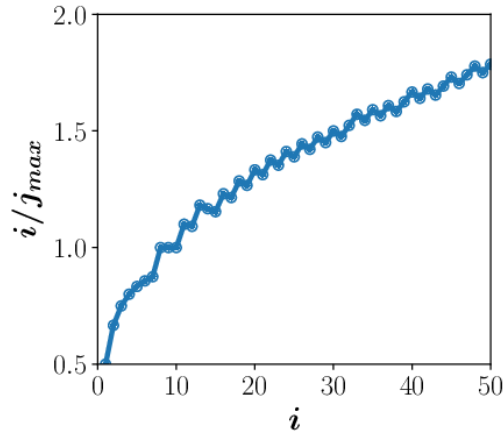

**Figure S1:** Ratio of metal atoms,  $i$ , to the number of ligand binding sites  $j_{\max}$  (defined by  $N_{s,i}$ ) as a function of the number of metal atoms in the cluster. As the figure indicates, the ratio increases with  $i$ .

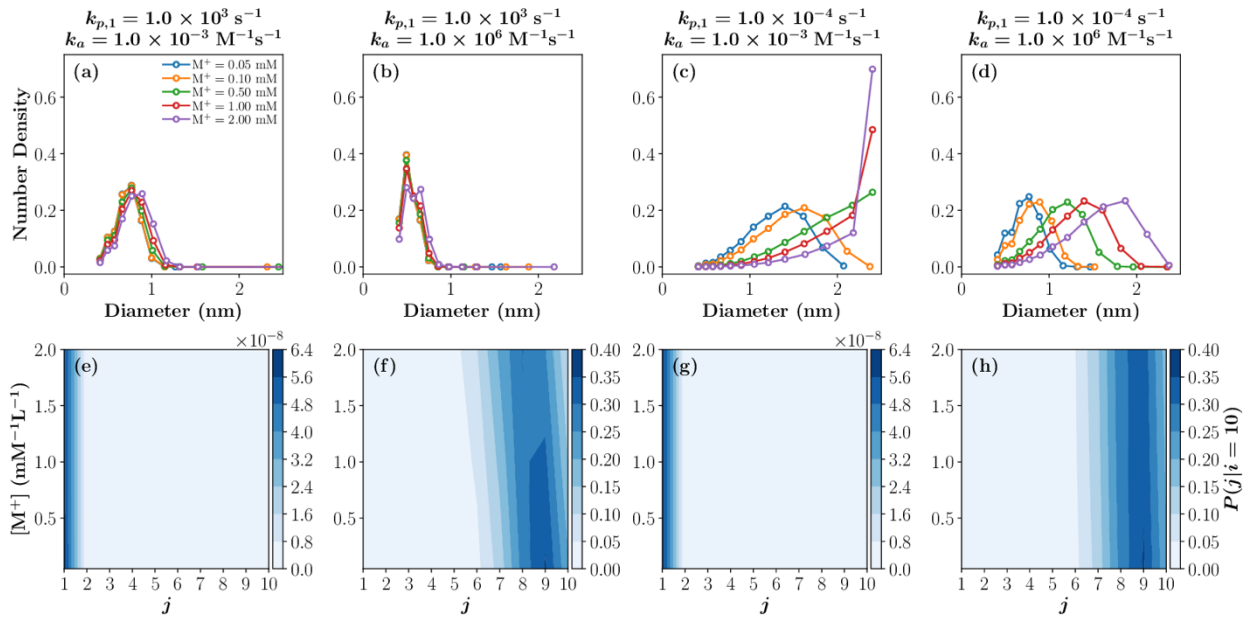

**Figure S2:** Figure 7 of the manuscript reproduced with a ligand binding rate of  $k_b = 10^2 \text{ M}^{-1} \text{ s}^{-1}$ .

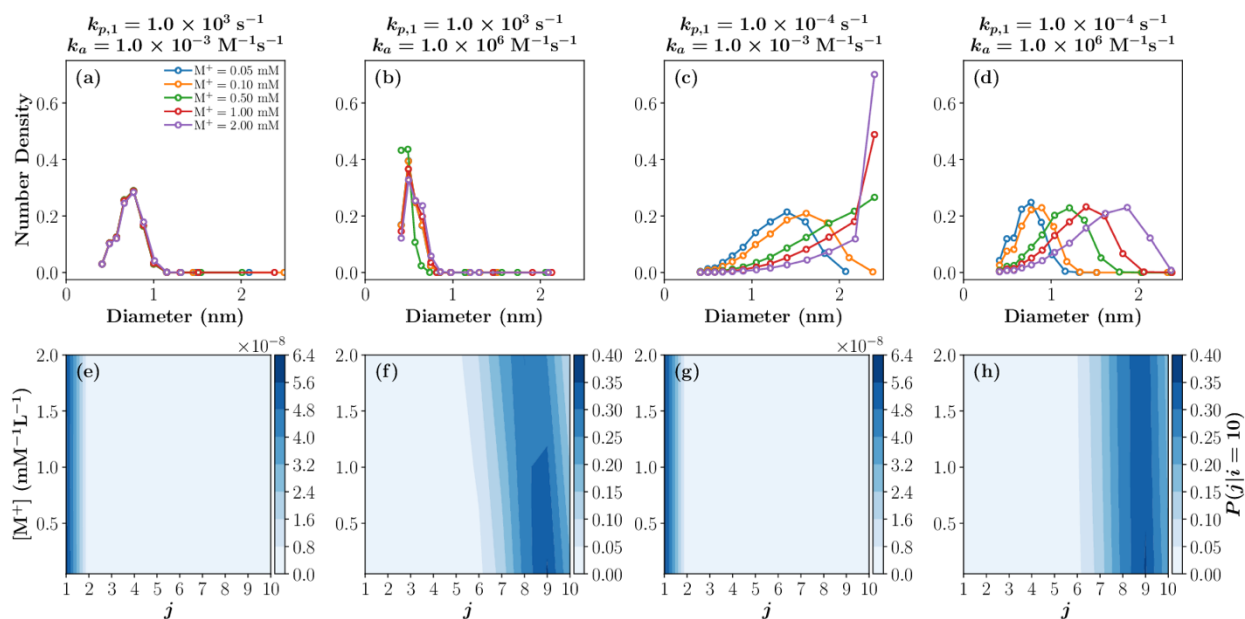

**Figure S3:** Figure 7 of the manuscript reproduced with a ligand binding rate of  $k_b = 10^3 \text{ M}^{-1} \text{ s}^{-1}$ .

**Scheme 4:** Reaction scheme for Figure S4 incorporating bare metal growth.

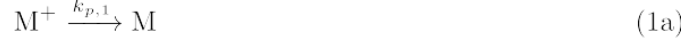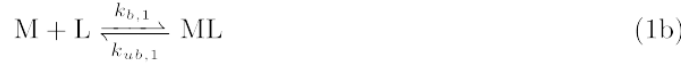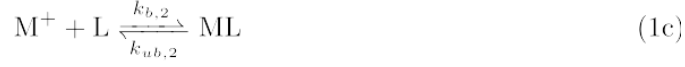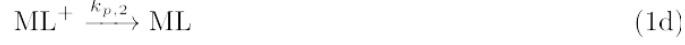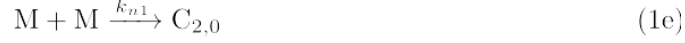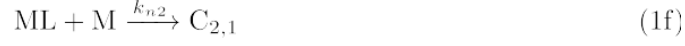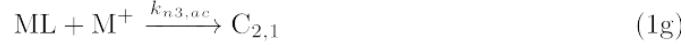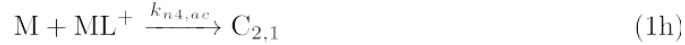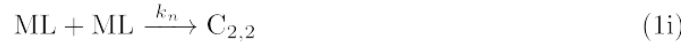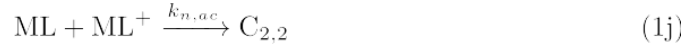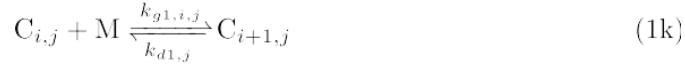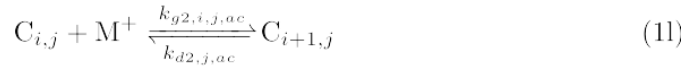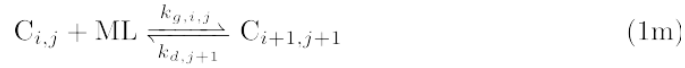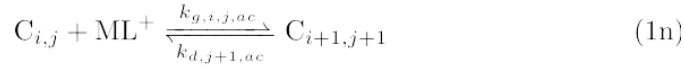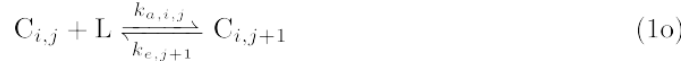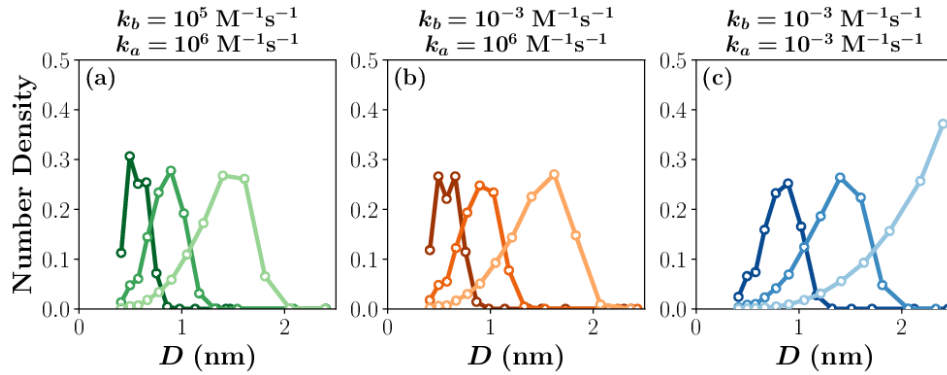

**Figure S4:** Size distribution for different growth rates (colors) and ligand binding rates: (a)  $k_b = 10^5 \text{ M}^{-1} \text{ s}^{-1}$ ,  $k_a = 10^6 \text{ M}^{-1} \text{ s}^{-1}$ , (b)  $k_b = 10^{-3} \text{ M}^{-1} \text{ s}^{-1}$ ,  $k_a = 10^6 \text{ M}^{-1} \text{ s}^{-1}$ , and (c)  $k_b = 10^{-3} \text{ M}^{-1} \text{ s}^{-1}$ ,  $k_a = 10^{-3} \text{ M}^{-1} \text{ s}^{-1}$ . Dark is  $k_g = 10^3$ , medium is  $10^4$ , and light is  $10^5 \text{ M}^{-1} \text{ s}^{-1}$ . The nanoclusters grow uncontrollably as  $k_g$  increases when the ligand binding rates are small (c). The values for the rate coefficients not listed are the same as listed in Table 2, Scheme 3 in the main text.

## References



1. Lazzari, S.; Theiler, P.; Shen, Y.; Coley, C.; Stemmer, A.; Jensen, K. Ligand-Mediated Nanocrystal Growth. *Langmuir* **2018**, *34* (10), 3307-3315.
